# Supplementary material
Source: publisher figshare collection journal article supplement (https://frontiersin.figshare.com/ndownloader/files/13076417)
Supplement: Supplementary file [file 13076417]

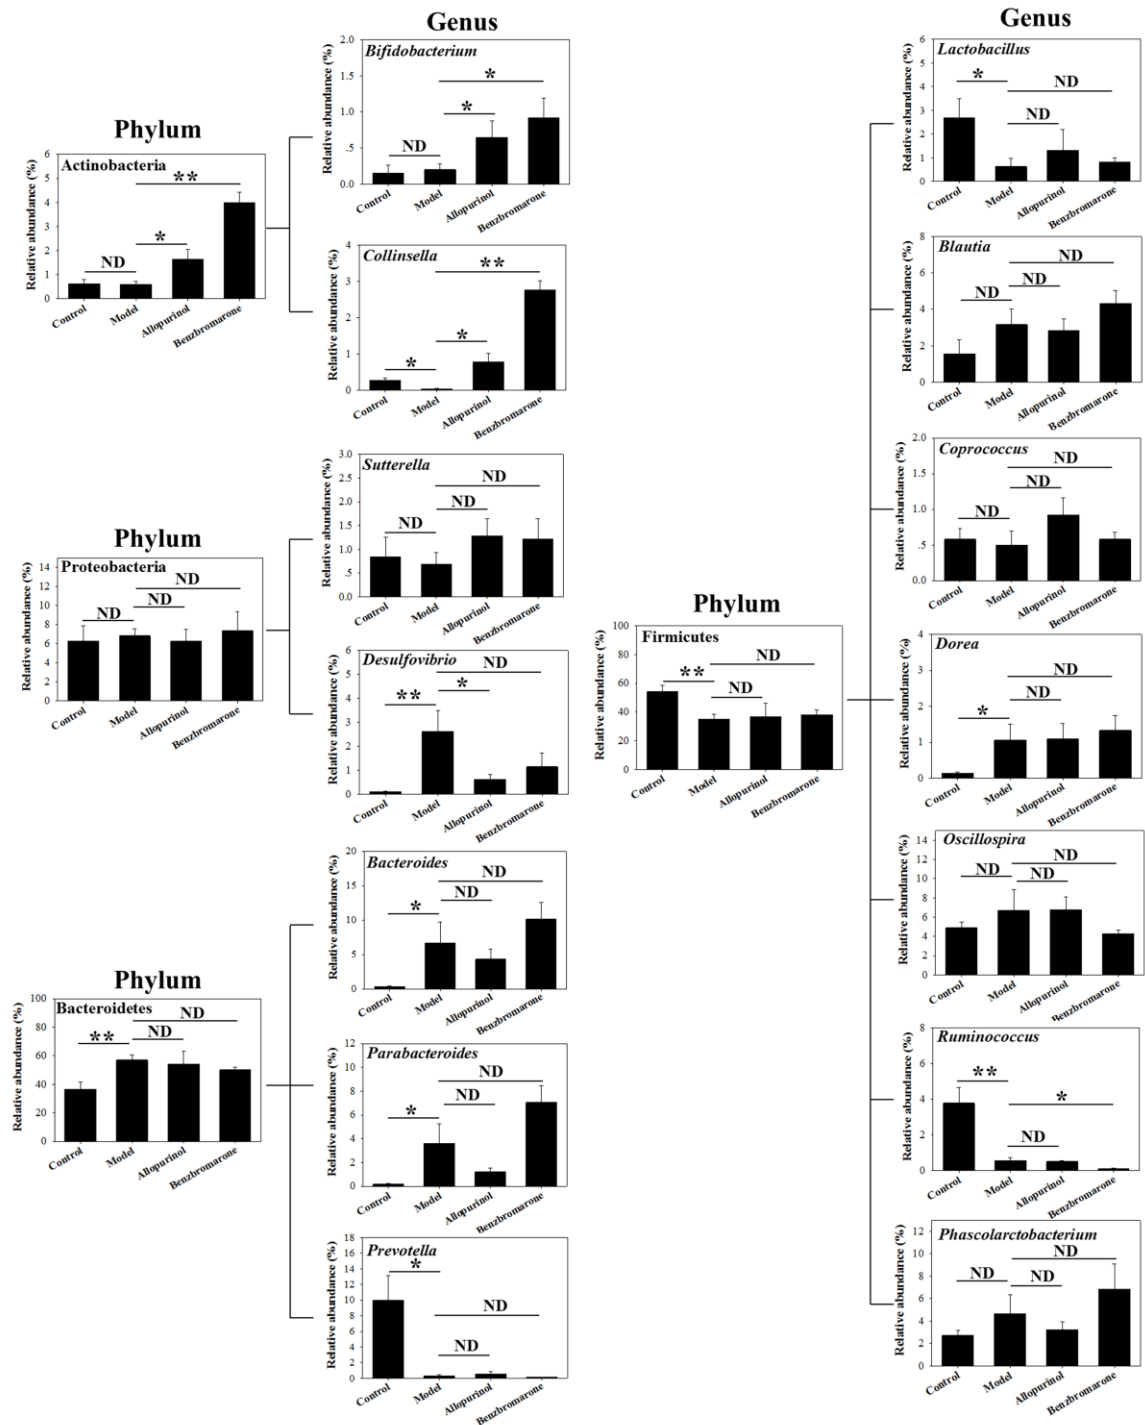

**Figure S1** the taxa with relative abundances above 1% at the phylum and genus levels. “\*” represents the adjusted  $p$  value  $<0.05$  between two groups; “\*\*” represents the adjusted  $p$  value  $<0.01$  between two groups; “ND” represents the adjusted  $p$  value  $>0.05$  between groups.
